# Supplementary material for: Genomic and Phylogenetic Analysis of Lactiplantibacillus plantarum L125, and Evaluation of Its Anti-Proliferative and Cytotoxic Activity in Cancer Cells
Source: MDPI journal article supplement (doi:10.3390/biomedicines9111718), 2021-11-19
Supplement: s1 [file s1]

## Supplementary Materials

Tree scale: 1 

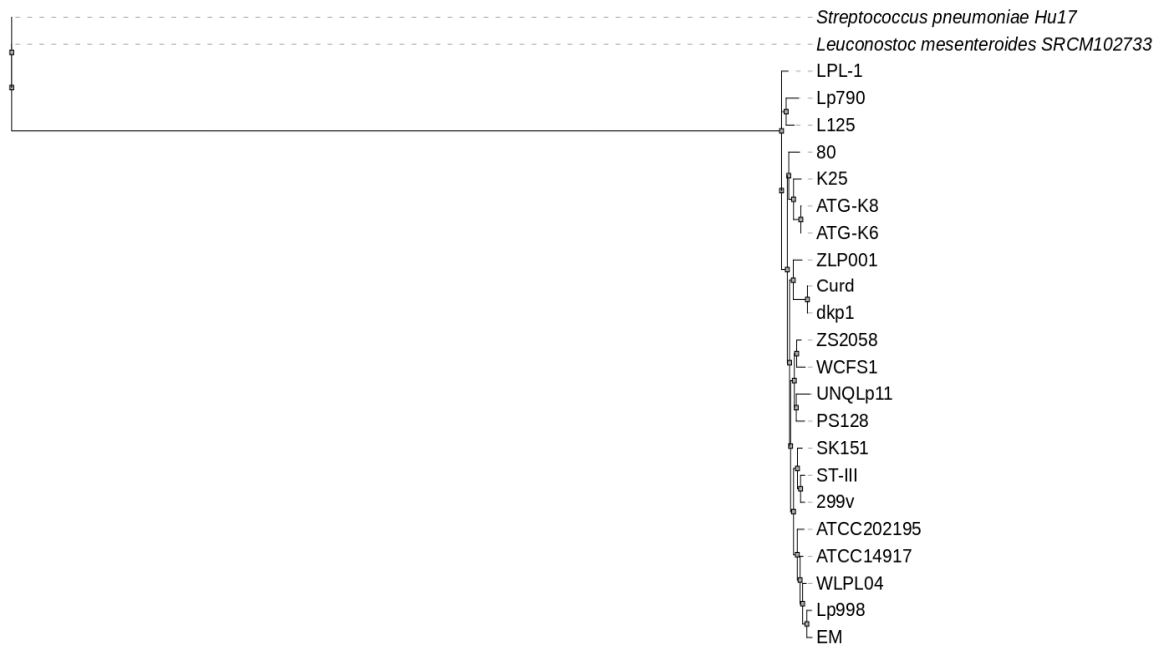

**Figure S1.** Neighbor-joining phylogenetic tree based on orthologous genes, of *L. plantarum* L125 and 21 *L. plantarum* strains. *Streptococcus pneumoniae* Hu17 and *Leuconostoc mesenteroides* SRCM102733 have been used as outgroups/controls.

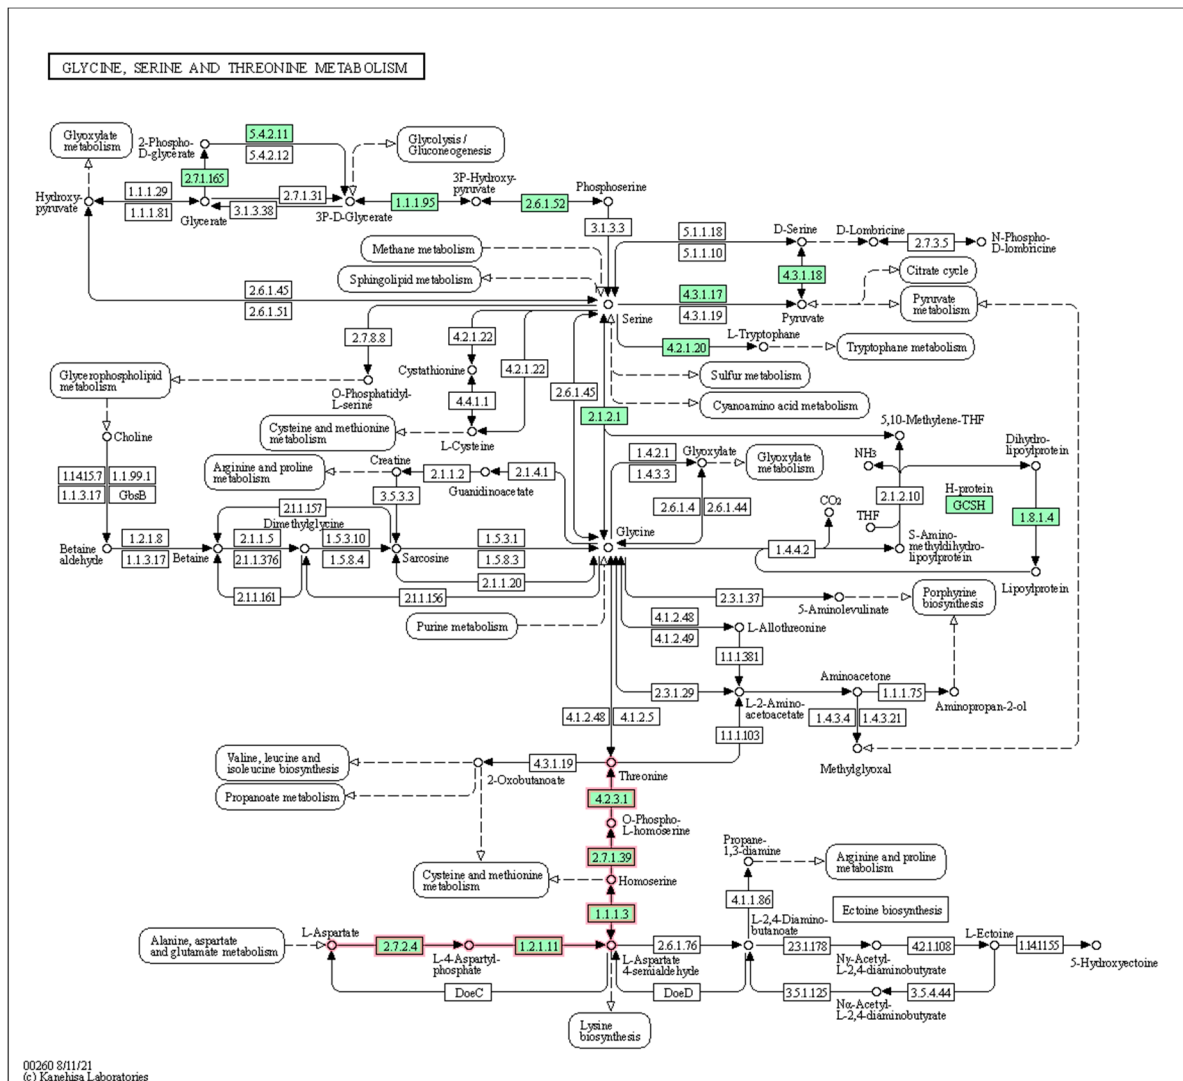

**Figure S2:** The KEGG pathway of Glycine, Serine and Threonine Metabolism (ko: 00260). Every box represents a protein involved in the pathway. *L. plantarum* L125 possesses the proteins presented in green colored boxes. Green boxes outlined with pink color make up the complete threonine biosynthesis module (M00018), indicating the ability of *L. plantarum* L125 to synthesize Threonine.



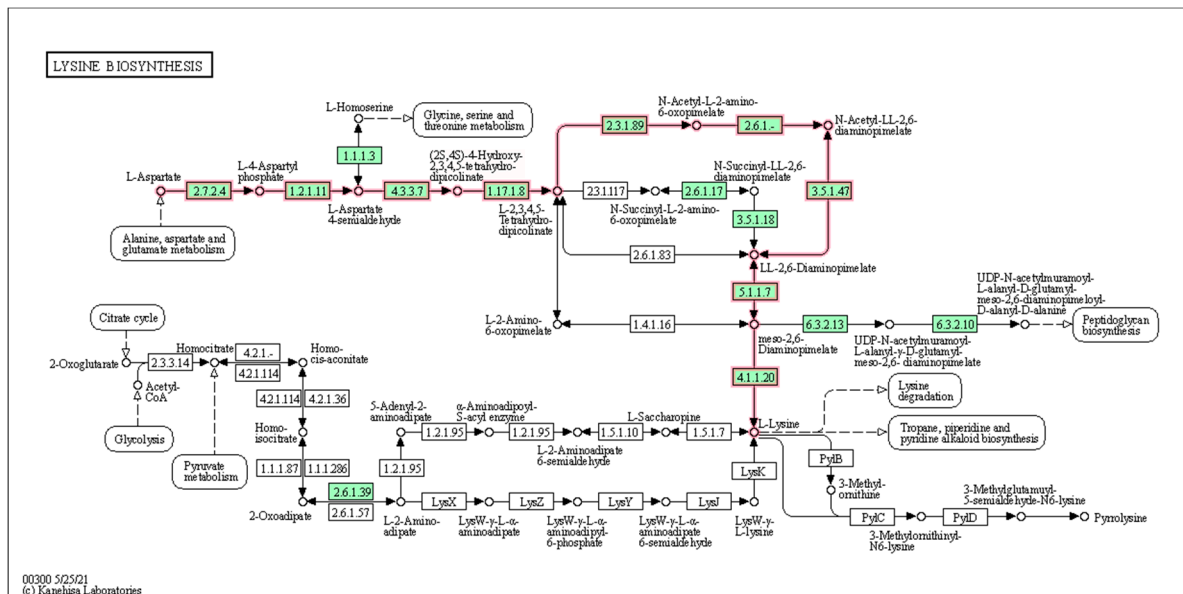

**Figure S4.** The KEGG pathway of Lysine Metabolism (ko: 00300). Every box represents a protein involved in the pathway. *L. plantarum* L125 possesses all the proteins presented in green colored boxes. Green boxes outlined with pink color make up the complete lysine biosynthesis module (M00525), indicating the ability of *L. plantarum* L125 to synthesize Lysine.

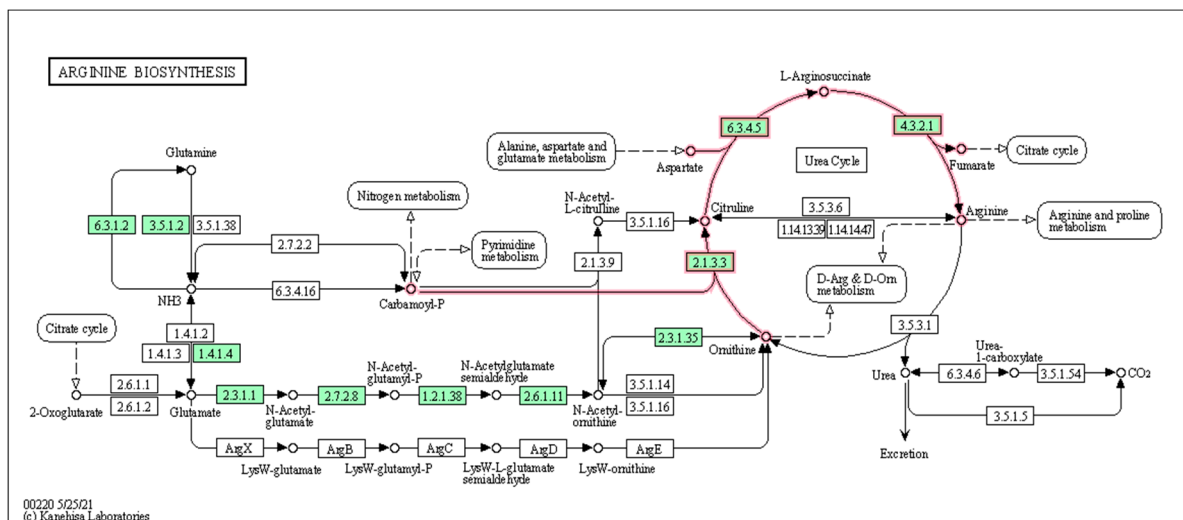

**Figure S5.** The KEGG pathway of Arginine Metabolism (ko: 00220). Every box represents a protein involved in the pathway. *L. plantarum* L125 possesses all the proteins presented in green colored boxes. Green boxes outlined with pink color make up the complete arginine biosynthesis module (M00844), indicating the ability of *L. plantarum* L125 to synthesize Arginine.

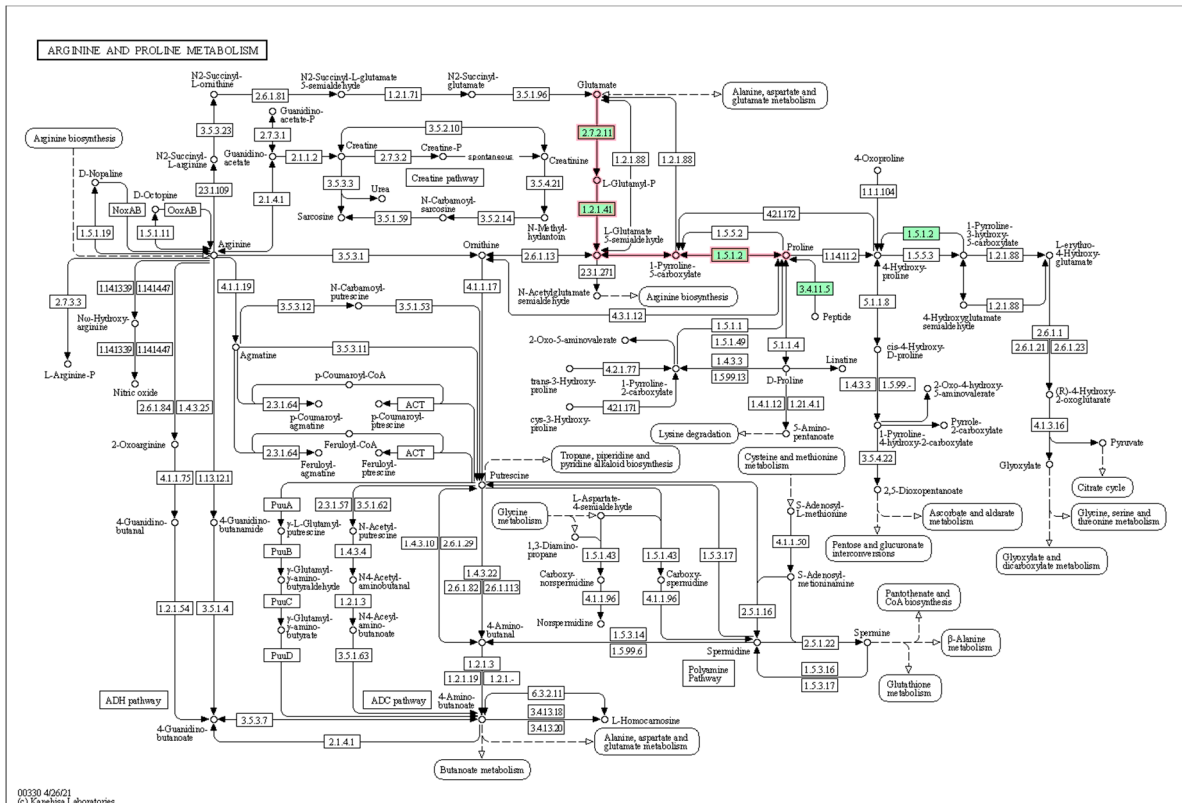

**Figure S6.** The KEGG pathway of Arginine and Proline Metabolism (ko: 00330). Every box represents a protein involved in the pathway. *L. plantarum* L125 possesses all the proteins presented in green colored boxes. Green boxes outlined with pink color make up the complete proline biosynthesis module (M00015), indicating the ability of *L. plantarum* L125 to synthesize Proline.

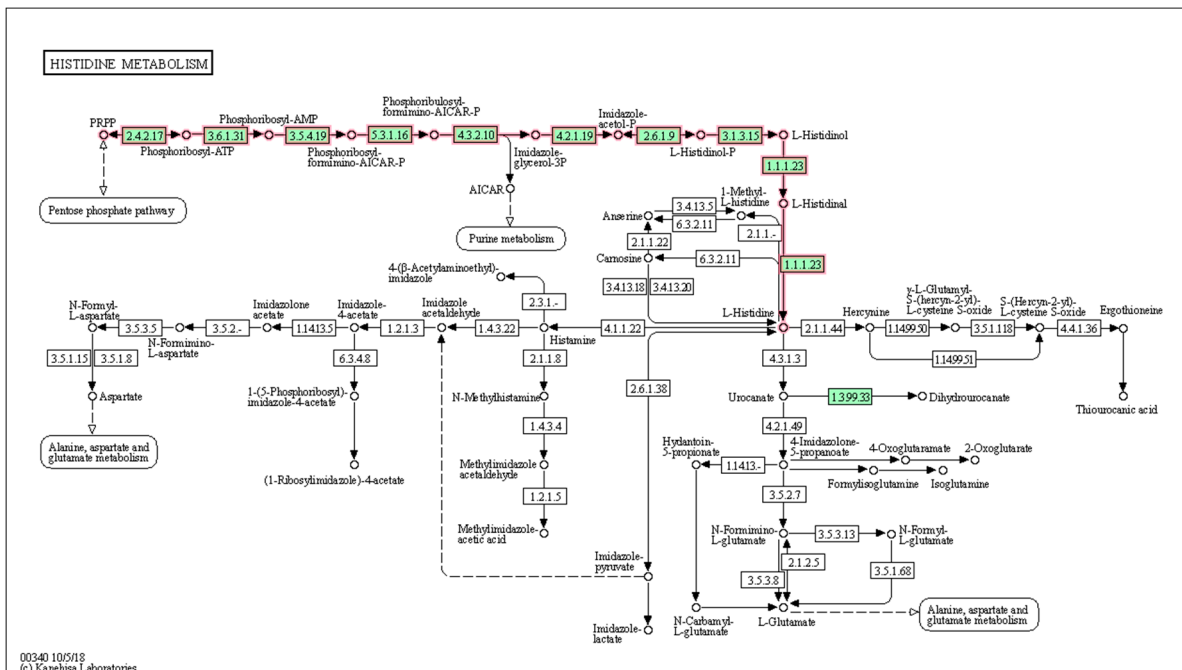

**Figure S7.** The KEGG pathway of Histidine Metabolism (ko: 00340). Every box represents a protein involved in the pathway. *L. plantarum* L125 possesses all the proteins presented in green colored boxes. Green boxes outlined with pink color make up the complete histidine biosynthesis module (M00026), indicating the ability of *L. plantarum* L125 to synthesize Histidine.

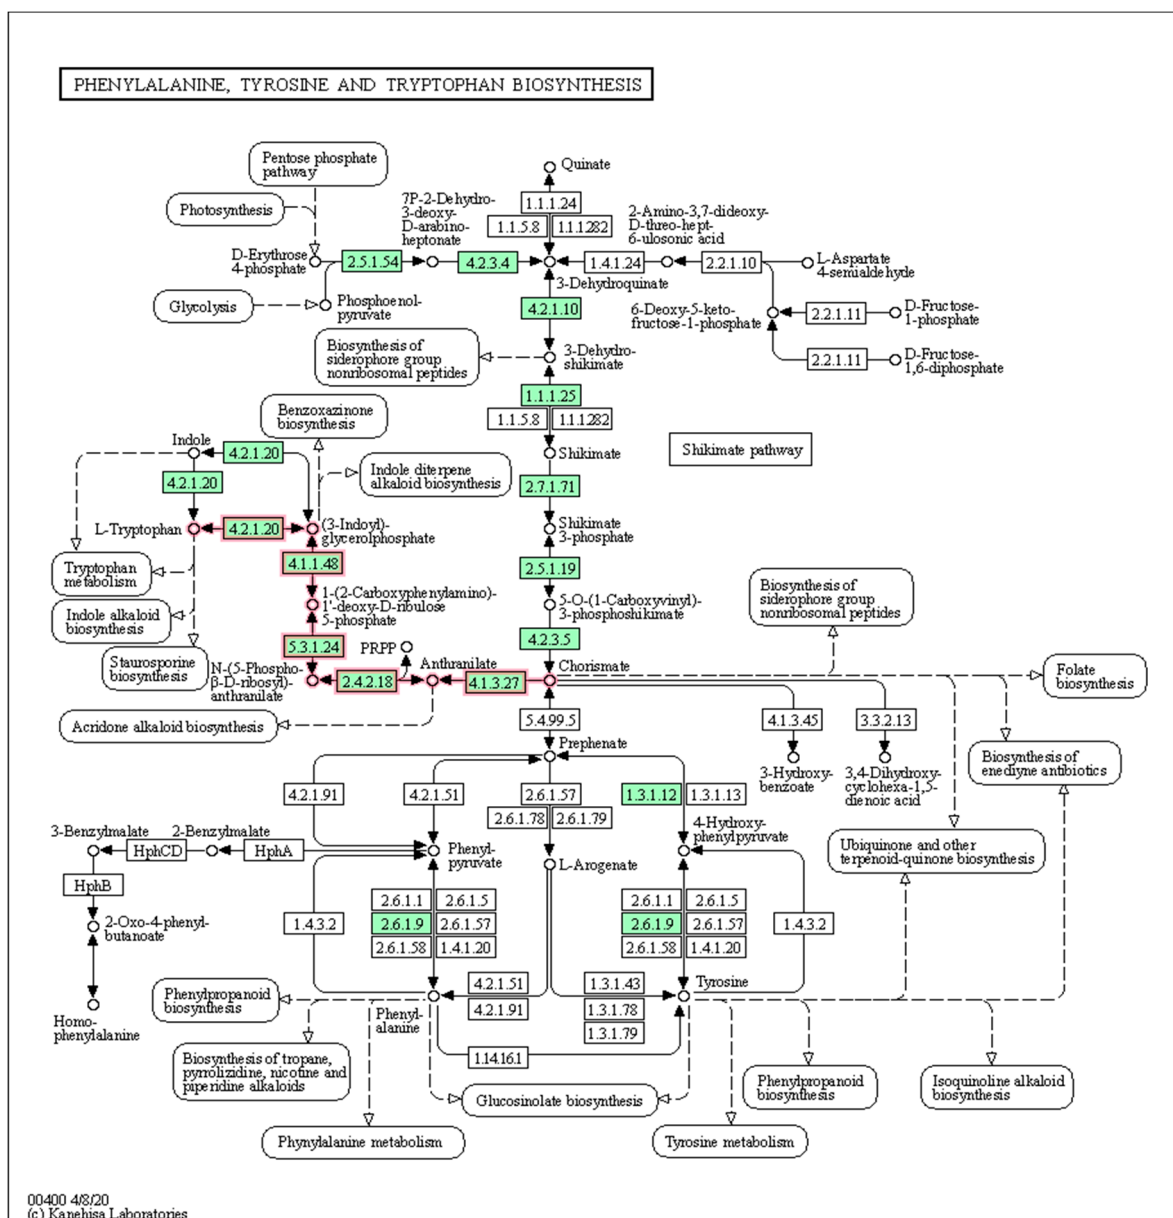

**Figure S8.** The KEGG pathway of Tryptophan Metabolism KEGG pathway (ko: 00400). Every box represents a protein involved in the pathway. *L. plantarum* L125 possesses all the proteins presented in green colored boxes. Green boxes outlined with pink color make up the complete tryptophan biosynthesis module (M00023), indicating the ability of *L. plantarum* L125 to synthesize Tryptophan.
